# Supplementary material
Source: MDPI journal article supplement (https://www.mdpi.com/2072-4292/14/1/69)
Supplement: s1 [file s1=3fversion=3d1640346536]

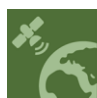

SUPPLEMENTARY MATERIALS

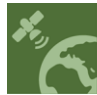

Table S1. Mean effect of the variation in the Aerosol Optical Depth (AOD) on the Total respiratory disease hospitalization counts due to the burned area.

|                                  | IVc01                 |                       |                       | IVc02                 |                       |                       | IVc03                 |                       |                       | IVc04                 |                         |                       |
|----------------------------------|-----------------------|-----------------------|-----------------------|-----------------------|-----------------------|-----------------------|-----------------------|-----------------------|-----------------------|-----------------------|-------------------------|-----------------------|
| OLS                              |                       |                       |                       |                       |                       |                       |                       |                       |                       |                       |                         |                       |
| AOD (OLS)                        | 0.0443***<br>(0.0072) | 0.0925***<br>(0.0072) | 0.0455***<br>(0.0067) | 0.0443***<br>(0.0072) | 0.0925***<br>(0.0072) | 0.0455***<br>(0.0067) | 0.0443***<br>(0.0072) | 0.0925***<br>(0.0072) | 0.0455***<br>(0.0067) | 0.0443***<br>(0.0072) | 0.0925***<br>(0.0072)   | 0.0455***<br>(0.0067) |
| # obs.                           | 118,335               | 118,335               | 118,335               | 118,335               | 118,335               | 118,335               | 118,335               | 118,335               | 118,335               | 118,335               | 118,335                 | 118,335               |
| IV                               |                       |                       |                       |                       |                       |                       |                       |                       |                       |                       |                         |                       |
| AOD (2SLS)                       | 0.1383***<br>(0.0294) | 0.0771*<br>(0.0321)   | 0.1359***<br>(0.0243) | 0.1336***<br>(0.0315) | -0.9626***<br>(0.105) | 0.1361***<br>(0.0262) | 0.1401**<br>(0.0466)  | 0.0942**<br>(0.0322)  | 0.1389***<br>(0.0383) | 0.0461<br>(0.1037)    | -12.9107***<br>(2.5574) | 2.2891<br>(3.1566)    |
| # obs.                           | 118,335               | 118,335               | 118,335               | 118,335               | 118,335               | 118,335               | 118,335               | 118,335               | 118,335               | 118,335               | 118,335                 | 118,335               |
| Fixed effect                     | Y                     | N                     | Y                     | Y                     | N                     | Y                     | Y                     | N                     | Y                     | Y                     | N                       | Y                     |
| Controls                         | Y                     | Y                     | N                     | Y                     | Y                     | N                     | Y                     | Y                     | N                     | Y                     | Y                       | N                     |
| Exogeneity and IV validity tests |                       |                       |                       |                       |                       |                       |                       |                       |                       |                       |                         |                       |
| Exog                             | 13.82***              | 0.24 <sup>ns</sup>    | 21.50***              | 11.59***              | 120.06***             | 20.07***              | 4.33*                 | 0.0027 <sup>ns</sup>  | 5.58*                 | 0.0006 <sup>ns</sup>  | 742.87***               | 7.18**                |
| Overid                           | 1.204 <sup>ns</sup>   | 779.886***            | 4.41 <sup>ns</sup>    | 0.774 <sup>ns</sup>   | 549.951***            | 4.409*                | 1.176 <sup>ns</sup>   | 741.718***            | 4.396*                | -                     | -                       | -                     |
| Weak Instrument tests            |                       |                       |                       |                       |                       |                       |                       |                       |                       |                       |                         |                       |
| Joint                            | 1103.36               | 945.817               | 2617.91               | 1396.41               | 250.833               | 1396.41               | 576.324               | 576                   | 991.908               | 252.589               | 20.5295                 | 252.589               |
| Yogo: stat                       | 1445.95               | 2087.78               | 2764.63               | 1703.26               | 330.615               | 1703.26               | 1045.85               | 1045.85               | 1729.91               | 282.652               | 26.7979                 | 282.652               |
| Yogo: crit                       | 22.3                  | 22.3                  | 22.3                  | 19.93                 | 19.93                 | 19.93                 | 19.93                 | 19.93                 | 19.93                 | 16.38                 | 16.38                   | 16.38                 |

Notes: Set of instruments: IVc01 is the Log\_Ba plus the BaWSpeed and the BaWDirec; IVc02 is the Log\_Ba plus the BaWSpeed; IVc03 is the Log\_Ba plus the BaWDirec, and; IVc04 is only Log\_Ba. “Exog.”, computes a test of exogeneity for a fixed-effect regression estimated via instrumental variables; “Overid” is the Sargan-Hansen statistic for instrument overidentification test. “Joint”, for the joint significance test of the instruments in the first stage regression; “Yogo: stat”, is the value of the Stock and Yogo test for instrument weakness; “Yogo: crit”, is the table value for the Stock and Yogo test. Significance level: “\*\*\*\*” p<0.001, “\*\*\*” p<0.01, “\*\*” p<0.05, “\*” p<0.1, “ns” not significant.

Table S2. Mean effect of the variation in the Aerosol Optical Depth (AOD) on the hospitalization of Small Children due to the burned area.

|                                  | IVc01                |                                   |                       | IVc02                |                        |                       | IVc03                             |                                   |                      | IVc04                  |                         |                                  |
|----------------------------------|----------------------|-----------------------------------|-----------------------|----------------------|------------------------|-----------------------|-----------------------------------|-----------------------------------|----------------------|------------------------|-------------------------|----------------------------------|
| OLS                              |                      |                                   |                       |                      |                        |                       |                                   |                                   |                      |                        |                         |                                  |
| AOD (OLS)                        | 0.0177**<br>(0.0068) | 0.0700***<br>(0.0056)             | 0.0222**<br>(0.0073)  | 0.0177**<br>(0.0068) | 0.0700***<br>(0.0056)  | 0.0222**<br>(0.0073)  | 0.0177**<br>(0.0068)              | 0.0700***<br>(0.0056)             | 0.0222**<br>(0.0073) | 0.0177**<br>(0.0068)   | 0.0700***<br>(0.0056)   | 0.0222**<br>(0.0073)             |
| # obs.                           | 118,335              | 118,335                           | 118,335               | 118,335              | 118,335                | 118,335               | 118,335                           | 118,335                           | 118,335              | 118,335                | 118,335                 | 118,335                          |
| IV                               |                      |                                   |                       |                      |                        |                       |                                   |                                   |                      |                        |                         |                                  |
| AOD (2SLS)                       | 0.0760**<br>(0.0271) | -0.0403 <sup>ns</sup><br>(0.0258) | 0.1129***<br>(0.0241) | 0.0761**<br>(0.0292) | -0.4136***<br>(0.0797) | 0.1187***<br>(0.0258) | -0.0210 <sup>ns</sup><br>(0.0476) | -0.0422 <sup>ns</sup><br>(0.0259) | 0.0865*<br>(0.0422)  | -0.3381***<br>(0.1047) | -11.5719***<br>(2.2816) | 5.6374 <sup>ns</sup><br>(7.5374) |
| # obs.                           | 118,335              | 118,335                           | 118,335               | 118,335              | 118,335                | 118,335               | 118,335                           | 118,335                           | 118,335              | 118,335                | 118,335                 | 118,335                          |
| Fixed effect                     | Y                    | N                                 | Y                     | Y                    | N                      | Y                     | Y                                 | N                                 | Y                    | Y                      | N                       | Y                                |
| Controls                         | Y                    | Y                                 | N                     | Y                    | Y                      | N                     | Y                                 | Y                                 | N                    | Y                      | Y                       | N                                |
| Exogeneity and IV validity tests |                      |                                   |                       |                      |                        |                       |                                   |                                   |                      |                        |                         |                                  |
| Exog                             | 7.23**               | 19.35***                          | 29.26***              | 6.73**               | 39.26***               | 30.77***              | 0.91 <sup>ns</sup>                | 19.84***                          | 3.59.                | 20.9530***             | 929.26***               | 60.23***                         |
| Overid                           | 21.757***            | 906.273***                        | 32.163***             | 21.753***            | 833.464***             | 31.481***             | 15.014***                         | 912.353***                        | 31.604***            | -                      | -                       | -                                |
| Weak Instrument tests            |                      |                                   |                       |                      |                        |                       |                                   |                                   |                      |                        |                         |                                  |
| Joint                            | 1103.36              | 945.817                           | 2617.91               | 1396.41              | 250.833                | 1396.41               | 576.324                           | 576.324                           | 991.908              | 252.589                | 20.5295                 | 252.589                          |
| Yogo: stat                       | 1445.95              | 2087.78                           | 2764.63               | 1703.26              | 330.615                | 1703.26               | 1045.85                           | 1045.85                           | 1729.91              | 282.652                | 26.7979                 | 282.652                          |
| Yogo: crit                       | 22.3                 | 22.3                              | 22.3                  | 19.93                | 19.93                  | 19.93                 | 19.93                             | 19.93                             | 19.93                | 16.38                  | 16.38                   | 16.38                            |

Notes: Set of instruments: IVc01 is the Log\_Ba plus the BaWSpeed and the BaWDirec; IVc02 is the Log\_Ba plus the BaWSpeed; IVc03 is the Log\_Ba plus the BaWDirec, and; IVc04 is only Log\_Ba. “Exog.”, computes a test of exogeneity for a fixed-effect regression estimated via instrumental variables; “Overid” is the Sargan-Hansen statistic for instrument overidentification test. “Joint”, for the joint significance test of the instruments in the first stage regression; “Yogo: stat”, is the value of the Stock and Yogo test for instrument weakness; “Yogo: crit”, is the table value for the Stock and Yogo test. Significance level: “\*\*\*” p<0.001, “\*\*” p<0.01, “\*” p<0.05, “.”p<0.1, “ns” not significant.

Table S3. Mean effect of the variation in the Aerosol Optical Depth (AOD) on the hospitalization of children due to the burned area.

|                                  | IVc01                             |                       |                     | IVc02                             |                        |                     | IVc03                             |                       |                                   | IVc04                             |                        |                                   |
|----------------------------------|-----------------------------------|-----------------------|---------------------|-----------------------------------|------------------------|---------------------|-----------------------------------|-----------------------|-----------------------------------|-----------------------------------|------------------------|-----------------------------------|
| OLS                              |                                   |                       |                     |                                   |                        |                     |                                   |                       |                                   |                                   |                        |                                   |
| AOD (OLS)                        | -0.0061 <sup>ns</sup><br>(0.0051) | 0.0500***<br>(0.0039) | -0.0047<br>(0.0053) | -0.0061 <sup>ns</sup><br>(0.0051) | 0.0500***<br>(0.0039)  | -0.0047<br>(0.0053) | -0.0061 <sup>ns</sup><br>(0.0051) | 0.0500***<br>(0.0039) | -0.0047<br>(0.0053)               | -0.0061 <sup>ns</sup><br>(0.0051) | 0.0500***<br>(0.0039)  | -0.0047 <sup>ns</sup><br>(0.0053) |
| # obs.                           | 118,335                           | 118,335               | 118,335             | 118,335                           | 118,335                | 118,335             | 118,335                           | 118,335               | 118,335                           | 118,335                           | 118,335                | 118,335                           |
| IV                               |                                   |                       |                     |                                   |                        |                     |                                   |                       |                                   |                                   |                        |                                   |
| AOD (2SLS)                       | 0.0094 <sup>ns</sup><br>(0.0201)  | -0.0464*<br>(0.0182)  | 0.0223<br>(0.0164)  | 0.0177 <sup>ns</sup><br>(0.0212)  | -0.5826***<br>(0.0598) | 0.0312.<br>(0.0173) | -0.0765*<br>(0.0364)              | -0.0347.<br>(0.0182)  | -0.0291 <sup>ns</sup><br>(0.0306) | -0.1815*<br>(0.0761)              | -4.3372***<br>(0.8896) | 2.7389 <sup>ns</sup><br>(3.7735)  |
| # obs.                           | 118,335                           | 118,335               | 118,335             | 118,335                           | 118,335                | 118,335             | 118,335                           | 118,335               | 118,335                           | 118,335                           | 118,335                | 118,335                           |
| Fixed effect                     | Y                                 | N                     | Y                   | Y                                 | N                      | Y                   | Y                                 | N                     | Y                                 | Y                                 | N                      | Y                                 |
| Controls                         | Y                                 | Y                     | N                   | Y                                 | Y                      | N                   | Y                                 | Y                     | N                                 | Y                                 | Y                      | N                                 |
| Exogeneity and IV validity tests |                                   |                       |                     |                                   |                        |                     |                                   |                       |                                   |                                   |                        |                                   |
| Exog                             | 0.84 <sup>ns</sup>                | 29.78***              | 3.98*               | 1.79 <sup>ns</sup>                | 135.56***              | 6.48*               | 4.58*                             | 22.86***              | 0.74 <sup>ns</sup>                | 7.6436**                          | 264.49***              | 21.68***                          |
| Overid                           | 10.966**                          | 308.79***             | 20.107***           | 8.499**                           | 167.23***              | 15.235***           | 2.895.                            | 254.004***            | 15.81***                          | -                                 | -                      | -                                 |
| Weak Instrument tests            |                                   |                       |                     |                                   |                        |                     |                                   |                       |                                   |                                   |                        |                                   |
| Joint                            | 1103.36                           | 945.817               | 2617.91             | 1396.41                           | 250.833                | 1396.41             | 576.324                           | 576.324               | 991.908                           | 252.589                           | 20.5295                | 252.589                           |
| Yogo: stat                       | 1445.95                           | 2087.78               | 2764.63             | 1703.26                           | 330.615                | 1703.26             | 0.0174                            | 1045.85               | 1729.91                           | 282.652                           | 26.7979                | 282.652                           |
| Yogo: crit                       | 22.3                              | 22.3                  | 22.3                | 19.93                             | 19.93                  | 19.93               | 19.93                             | 19.93                 | 19.93                             | 16.38                             | 16.38                  | 16.38                             |

Notes: Set of instruments: IVc01 is the Log\_Ba plus the BaWSpeed and the BaWDirec; IVc02 is the Log\_Ba plus the BaWSpeed; IVc03 is the Log\_Ba plus the BaWDirec, and; IVc04 is only Log\_Ba. "Exog.", computes a test of exogeneity for a fixed-effect regression estimated via instrumental variables; "Overid" is the Sargan-Hansen statistic for instrument overidentification test. "Joint", for the joint significance test of the instruments in the first stage regression; "Yogo: stat", is the value of the Stock and Yogo test for instrument weakness; "Yogo: crit", is the table value for the Stock and Yogo test. Significance level: "\*\*\*\*"  $p < 0.001$ , "\*\*\*"  $p < 0.01$ , "\*\*"  $p < 0.05$ , "."  $p < 0.1$ , "ns" not significant.

Table S4. Mean effect of the variation in the Aerosol Optical Depth (AOD) on the hospitalization of the elderly due to the burned area.

|                                   | IVc01                 |                       |                       | IVc02                 |                       |                       | IVc03                 |                       |                       | IVc04                 |                        |                       |
|-----------------------------------|-----------------------|-----------------------|-----------------------|-----------------------|-----------------------|-----------------------|-----------------------|-----------------------|-----------------------|-----------------------|------------------------|-----------------------|
| OLS                               |                       |                       |                       |                       |                       |                       |                       |                       |                       |                       |                        |                       |
| AOD(OLS)                          | 0.0215***<br>(0.0051) | 0.0218***<br>(0.0045) | 0.0290***<br>(0.0052) | 0.0215***<br>(0.0051) | 0.0218***<br>(0.0045) | 0.0290***<br>(0.0052) | 0.0215***<br>(0.0051) | 0.0218***<br>(0.0045) | 0.0290***<br>(0.0052) | 0.0215***<br>(0.0051) | 0.0218***<br>(0.0045)  | 0.0290***<br>(0.0052) |
| # obs.                            | 118,335               | 118,335               | 118,335               | 118,335               | 118,335               | 118,335               | 118,335               | 118,335               | 118,335               | 118,335               | 118,335                | 118,335               |
| IV                                |                       |                       |                       |                       |                       |                       |                       |                       |                       |                       |                        |                       |
| AOD(2SLS)                         | 0.0428*<br>(0.0206)   | 0.0344.<br>(0.0204)   | 0.0590***<br>(0.0167) | 0.0581**<br>(0.0218)  | 0.3074***<br>(0.0624) | 0.0722***<br>(0.0179) | -0.0596.<br>(0.0352)  | 0.0187<br>(0.0205)    | -0.0211<br>(0.0294)   | -0.0720<br>(0.0719)   | -6.2621***<br>(1.2516) | 1.9639<br>(2.7017)    |
| # obs.                            | 118,335               | 118,335               | 118,335               | 118,335               | 118,335               | 118,335               | 118,335               | 118,335               | 118,335               | 118,335               | 118,335                | 118,335               |
| Fixed effect                      | Y                     | N                     | Y                     | Y                     | N                     | Y                     | Y                     | N                     | Y                     | Y                     | N                      | Y                     |
| Controls                          | Y                     | Y                     | N                     | Y                     | Y                     | N                     | Y                     | Y                     | N                     | Y                     | Y                      | N                     |
| Exogeneity and IV validity tests: |                       |                       |                       |                       |                       |                       |                       |                       |                       |                       |                        |                       |
| Exog                              | 1.47 <sup>ns</sup>    | 0.40***               | 4.77*                 | 3.94*                 | 21.74***              | 9.11**                | 6.02*                 | 0.02                  | 3.15.                 | 2.1189 <sup>ns</sup>  | 428.08***              | 10.58**               |
| Overid                            | 12.241**              | 508.117***            | 17.086***             | 3.733.                | 470.484***            | 7276**                | 0.041 <sup>ns</sup>   | 428.019***            | 7.856**               | -                     | -                      | -                     |
| Week Instrument tests:            |                       |                       |                       |                       |                       |                       |                       |                       |                       |                       |                        |                       |
| Joint                             | 1103.36               | 945.817               | 2617                  | 1396.41               | 250.833               | 1396.41               | 576.324               | 576.324               | 991.908               | 252.589               | 20.5295                | 252.589               |
| Yogo: stat                        | 1445.95               | 2087                  | 2764                  | 1703.26               | 330.615               | 1703.26               | 1045.85               | 1045.85               | 1729.91               | 282.652               | 26.7979                | 282.652               |
| Yogo: crit                        | 22.3                  | 22.3                  | 22.3                  | 19.93                 | 19.93                 | 19.93                 | 19.93                 | 19.93                 | 19.93                 | 16.38                 | 16.38                  | 16.38                 |

Notes: Set of instruments: IVc01 is the Log\_Ba plus the BaWSpeed and the BaWDirec; IVc02 is the Log\_Ba plus the BaWSpeed; IVc03 is the Log\_Ba plus the BaWDirec, and; IVc04 is only Log\_Ba. “Exog.”, computes a test of exogeneity for a fixed-effect regression estimated via instrumental variables; “Overid” is the Sargan-Hansen statistic for instrument overidentification test. “Joint”, for the joint significance test of the instruments in the first stage regression; “Yogo: stat”, is the value of the Stock and Yogo test for instrument weakness; “Yogo: crit”, is the table value for the Stock and Yogo test. Significance level: “\*\*\*\*” p<0.001, “\*\*\*” p<0.01, “\*\*” p<0.05, “\*” p<0.1, “ns” not significant.

Table S5. Mean effect of the variation in the Aerosol Optical Depth (AOD) on the Asthma hospitalizations due to the burned area.

|                                  | IVc01                 |                       |                       | IVc02                 |                        |                       | IVc03                |                       |                       | IVc04                |                        |                       |
|----------------------------------|-----------------------|-----------------------|-----------------------|-----------------------|------------------------|-----------------------|----------------------|-----------------------|-----------------------|----------------------|------------------------|-----------------------|
| OLS                              |                       |                       |                       |                       |                        |                       |                      |                       |                       |                      |                        |                       |
| AOD(OLS)                         | 0.0265***<br>(0.006)  | 0.0532***<br>(0.0047) | 0.0295***<br>(0.0059) | 0.0265***<br>(0.006)  | 0.0532***<br>(0.0047)  | 0.0295***<br>(0.0059) | 0.0265***<br>(0.006) | 0.0532***<br>(0.0047) | 0.0295***<br>(0.0059) | 0.0265***<br>(0.006) | 0.0532***<br>(0.0047)  | 0.0295***<br>(0.0059) |
| # obs.                           | 118,335               | 118,335               | 118,335               | 118,335               | 118,335                | 118,335               | 118,335              | 118,335               | 118,335               | 118,335              | 118,335                | 118,335               |
| IV                               |                       |                       |                       |                       |                        |                       |                      |                       |                       |                      |                        |                       |
| AOD(2SLS)                        | 0.0792***<br>(0.0244) | -0.0356<br>(0.0217)   | 0.0844***<br>(0.0204) | 0.0865***<br>(0.0254) | -0.9181***<br>(0.0754) | 0.0921***<br>(0.0214) | 0.0147<br>(0.0433)   | -0.0111<br>(0.0218)   | 0.0394<br>(0.0352)    | -0.0423<br>(0.0843)  | -2.4134***<br>(0.5755) | 2.3085<br>(3.2576)    |
| # obs.                           | 118,335               | 118,335               | 118,335               | 118,335               | 118,335                | 118,335               | 118,335              | 118,335               | 118,335               | 118,335              | 118,335                | 118,335               |
| Fixed effect                     | Y                     | N                     | Y                     | Y                     | N                      | Y                     | Y                    | N                     | Y                     | Y                    | N                      | Y                     |
| Controls                         | Y                     | Y                     | N                     | Y                     | Y                      | N                     | Y                    | Y                     | N                     | Y                    | Y                      | N                     |
| Exogeneity and IV validity tests |                       |                       |                       |                       |                        |                       |                      |                       |                       |                      |                        |                       |
| Exog                             | 6.63**                | 17.72***              | 11.53***              | 7.96**                | 224.02***              | 13.95***              | 0.09 <sup>ns</sup>   | 9.21**                | 0.09 <sup>ns</sup>    | 0.8569 <sup>ns</sup> | 58.47***               | 10.87***              |
| Overid                           | 3.5598 <sup>ns</sup>  | 228.13***             | 8.627*                | 2.52 <sup>ns</sup>    | 16.728***              | 7.011**               | 0.727 <sup>ns</sup>  | 55.595***             | 7.406**               | -                    | -                      | -                     |
| Week Instrument tests:           |                       |                       |                       |                       |                        |                       |                      |                       |                       |                      |                        |                       |
| Joint                            | 1103.36               | 945.817               | 2617                  | 1396.41               | 250.833                | 1396.41               | 576.324              | 576.324               | 991.908               | 252.589              | 20.5295                | 252.589               |
| Yogo: stat                       | 1445.95               | 2087.78               | 2764                  | 1703.26               | 330.615                | 1703.26               | 1045.85              | 1045.85               | 1729.91               | 282.652              | 26.7979                | 282.652               |
| Yogo: crit                       | 22.3                  | 22.3                  | 22.3                  | 19.93                 | 19.93                  | 19.93                 | 19.93                | 19.93                 | 19.93                 | 16.38                | 16.38                  | 16.38                 |

Notes: Set of instruments: IVc01 is the Log\_Ba plus the BaWSpeed and the BaWDirec; IVc02 is the Log\_Ba plus the BaWSpeed; IVc03 is the Log\_Ba plus the BaWDirec, and; IVc04 is only Log\_Ba. “Exog.”, computes a test of exogeneity for a fixed-effect regression estimated via instrumental variables; “Overid” is the Sargan-Hansen statistic for instrument overidentification test. “Joint”, for the joint significance test of the instruments in the first stage regression; “Yogo: stat”, is the value of the Stock and Yogo test for instrument weakness; “Yogo: crit”, is the table value for the Stock and Yogo test. Significance level: “\*\*\*” p<0.001, “\*\*” p<0.01, “\*” p<0.05, “.”p<0.1, “ns” not significant.

Table S6. Mean effect of the variation in the Aerosol Optical Depth (AOD) on the Pneumonia hospitalizations due to the burned area.

|                                  | IVc01                 |                        |                       | IVc02                 |                       |                       | IVc03                            |                        |                       | IVc04                             |                         |                                  |
|----------------------------------|-----------------------|------------------------|-----------------------|-----------------------|-----------------------|-----------------------|----------------------------------|------------------------|-----------------------|-----------------------------------|-------------------------|----------------------------------|
| OLS                              |                       |                        |                       |                       |                       |                       |                                  |                        |                       |                                   |                         |                                  |
| AOD (OLS)                        | 0.0594***<br>(0.0069) | 0.0244***<br>(0.0064)  | 0.0663***<br>(0.0069) | 0.0594***<br>(0.0069) | 0.0244***<br>(0.0064) | 0.0663***<br>(0.0069) | 0.0594***<br>(0.0069)            | 0.0244***<br>(0.0064)  | 0.0663***<br>(0.0069) | 0.0594***<br>(0.0069)             | 0.0244***<br>(0.0064)   | 0.0663***<br>(0.0069)            |
| # obs.                           | 118,335               | 118,335                | 118,335               | 118,335               | 118,335               | 118,335               | 118,335                          | 118,335                | 118,335               | 118,335                           | 118,335                 | 118,335                          |
| IV                               |                       |                        |                       |                       |                       |                       |                                  |                        |                       |                                   |                         |                                  |
| AOD (2SLS)                       | 0.1207***<br>(0.0281) | -0.1005***<br>(0.0287) | 0.1544***<br>(0.0242) | 0.1285***<br>(0.0303) | -0.4372***<br>(0.088) | 0.1655***<br>(0.0262) | 0.0122 <sup>ns</sup><br>(0.0477) | -0.1046***<br>(0.0288) | 0.0928*<br>(0.0396)   | -0.1790 <sup>ns</sup><br>(0.1098) | -12.6441***<br>(2.4844) | 5.2789 <sup>ns</sup><br>(6.9921) |
| # obs.                           | 118,335               | 118,335                | 118,335               | 118,335               | 118,335               | 118,335               | 118,335                          | 118,335                | 118,335               | 118,335                           | 118,335                 | 118,335                          |
| Fixed effect                     | Y                     | N                      | Y                     | Y                     | N                     | Y                     | Y                                | N                      | Y                     | Y                                 | N                       | Y                                |
| Controls                         | Y                     | Y                      | N                     | Y                     | Y                     | N                     | Y                                | Y                      | N                     | Y                                 | Y                       | N                                |
| Exogeneity and IV validity tests |                       |                        |                       |                       |                       |                       |                                  |                        |                       |                                   |                         |                                  |
| Exog                             | 6.36*                 | 20.07***               | 22.24***              | 7.51**                | 28.92***              | 26.26***              | 1.13 <sup>ns</sup>               | 21.25***               | 0.49 <sup>ns</sup>    | 7.6513**                          | 889.09***               | 42.23***                         |
| Overid                           | 11.308**              | 868***                 | 27.217***             | 9.99**                | 818.263***            | 23.546***             | 4.768*                           | 865.478***             | 23.765***             | -                                 | -                       | -                                |
| Week Instrument tests:           |                       |                        |                       |                       |                       |                       |                                  |                        |                       |                                   |                         |                                  |
| Joint                            | 110336                | 945.817                | 2617                  | 1396                  | 250.833               | 1396.41               | 576.324                          | 576.324                | 991.908               | 252.589                           | 20.5295                 | 252.589                          |
| Yogo: stat                       | 1445.95               | 2087                   | 2764                  | 1703                  | 330.615               | 1703.26               | 1045                             | 1045.85                | 1729.91               | 282.652                           | 26.7979                 | 282.652                          |
| Yogo: crit                       | 22.3                  | 22.3                   | 22.3                  | 19.93                 | 19.93                 | 19.93                 | 19.93                            | 19.93                  | 19.93                 | 16.38                             | 16.38                   | 16.38                            |

Notes: Set of instruments: IVc01 is the Log\_Ba plus the BaWSpeed and the BaWDirec; IVc02 is the Log\_Ba plus the BaWSpeed; IVc03 is the Log\_Ba plus the BaWDirec, and; IVc04 is only Log\_Ba. "Exog.", computes a test of exogeneity for a fixed-effect regression estimated via instrumental variables; "Overid" is the Sargan-Hansen statistic for instrument overidentification test. "Joint", for the joint significance test of the instruments in the first stage regression; "Yogo: stat", is the value of the Stock and Yogo test for instrument weakness; "Yogo: crit", is the table value for the Stock and Yogo test. Significance level: "\*\*\*\*"  $p < 0.001$ , "\*\*\*"  $p < 0.01$ , "\*\*"  $p < 0.05$ , "."  $p < 0.1$ , "ns" not significant.

Table S7. Mean effect of the variation in the Aerosol Optical Depth (AOD) on the Bronchitis hospitalizations due to the burned area.

|                                  | IVc01                            |                                  |                                  | IVc02                             |                        |                       | IVc03                            |                                  |                                  | IVc04                             |                      |                                  |
|----------------------------------|----------------------------------|----------------------------------|----------------------------------|-----------------------------------|------------------------|-----------------------|----------------------------------|----------------------------------|----------------------------------|-----------------------------------|----------------------|----------------------------------|
| OLS                              |                                  |                                  |                                  |                                   |                        |                       |                                  |                                  |                                  |                                   |                      |                                  |
| AOD (OLS)                        | 0.0103**<br>(0.0032)             | 0.0075***<br>(0.002)             | 0.0121***<br>(0.0037)            | 0.0103**<br>(0.0032)              | 0.0075***<br>(0.002)   | 0.0121***<br>(0.0037) | 0.0103**<br>(0.0032)             | 0.0075***<br>(0.002)             | 0.0121***<br>(0.0037)            | 0.0103**<br>(0.0032)              | 0.0075***<br>(0.002) | 0.0121***<br>(0.0037)            |
| # obs.                           | 118,335                          | 118,335                          | 118,335                          | 118,335                           | 118,335                | 118,335               | 118,335                          | 118,335                          | 118,335                          | 118,335                           | 118,335              | 118,335                          |
| IV                               |                                  |                                  |                                  |                                   |                        |                       |                                  |                                  |                                  |                                   |                      |                                  |
| AOD (2SLS)                       | 0.0011 <sup>ns</sup><br>(0.0139) | 0.0111 <sup>ns</sup><br>(0.0099) | 0.0072 <sup>ns</sup><br>(0.0127) | -0.0023 <sup>ns</sup><br>(0.0151) | -0.0958***<br>(0.0299) | 0.0046<br>(0.0138)    | 0.0169 <sup>ns</sup><br>(0.0215) | 0.0149 <sup>ns</sup><br>(0.0099) | 0.0240 <sup>ns</sup><br>(0.0191) | -0.0020 <sup>ns</sup><br>(0.0412) | 0.4608**<br>(0.1709) | 0.1545 <sup>ns</sup><br>(0.4591) |
| # obs.                           | 118,335                          | 118,335                          | 118,335                          | 118,335                           | 118,335                | 118,335               | 118,335                          | 118,335                          | 118,335                          | 118,335                           | 118,335              | 118,335                          |
| Fixed effect                     | Y                                | N                                | Y                                | Y                                 | N                      | Y                     | Y                                | N                                | Y                                | Y                                 | N                    | Y                                |
| Controls                         | Y                                | Y                                | N                                | Y                                 | Y                      | N                     | Y                                | Y                                | N                                | Y                                 | Y                    | N                                |
| Exogeneity and IV validity tests |                                  |                                  |                                  |                                   |                        |                       |                                  |                                  |                                  |                                   |                      |                                  |
| Exog                             | 0.60 <sup>ns</sup>               | 0.14 <sup>ns</sup>               | 0.28 <sup>ns</sup>               | 1.06 <sup>ns</sup>                | 12.24***               | 0.62 <sup>ns</sup>    | 0.11 <sup>ns</sup>               | 0.59 <sup>ns</sup>               | 0.46 <sup>ns</sup>               | 0.0867 <sup>ns</sup>              | 9.54**               | 0.14 <sup>ns</sup>               |
| Overid                           | 0.854 <sup>ns</sup>              | 29.635***                        | 1.042 <sup>ns</sup>              | 0 <sup>ns</sup>                   | 14.716***              | 0.127 <sup>ns</sup>   | 0.276 <sup>ns</sup>              | 9.267**                          | 0.095 <sup>ns</sup>              | -                                 | -                    | -                                |
| Week Instrument tests:           |                                  |                                  |                                  |                                   |                        |                       |                                  |                                  |                                  |                                   |                      |                                  |
| Joint                            | 1103.36                          | 945.817                          | 2617.91                          | 1396.41                           | 250.833                | 1396.41               | 576.324                          | 576                              | 991.908                          | 252.589                           | 20.5295              | 252.589                          |
| Yogo: stat                       | 1445.95                          | 2087.78                          | 2764.63                          | 1703.26                           | 330615                 | 1703.26               | 1045                             | 1045                             | 1729.91                          | 282.652                           | 26.7979              | 282.652                          |
| Yogo: crit                       | 22.3                             | 22.3                             | 22.3                             | 19.93                             | 19.93                  | 19.93                 | 19.93                            | 19.93                            | 19.93                            | 16.38                             | 16.38                | 16.38                            |

Notes: Set of instruments: IVc01 is the Log\_Ba plus the BaWSpeed and the BaWDirec; IVc02 is the Log\_Ba plus the BaWSpeed; IVc03 is the Log\_Ba plus the BaWDirec, and; IVc04 is only Log\_Ba. “Exog.”, computes a test of exogeneity for a fixed-effect regression estimated via instrumental variables; “Overid” is the Sargan-Hansen statistic for instrument overidentification test. “Joint”, for the joint significance test of the instruments in the first stage regression; “Yogo: stat”, is the value of the Stock and Yogo test for instrument weakness; “Yogo: crit”, is the table value for the Stock and Yogo test. Significance level: “\*\*\*” p<0.001, “\*\*” p<0.01, “\*” p<0.05, “.”p<0.1, “ns” not significant.
